# Supplementary material for: Mental health screening: severity and cut-off point sensitivity of the Athlete Psychological Strain Questionnaire in male and female elite athletes
Source: PubMed Central journal article supplement — BMJ Open Sport Exerc Med. 2020 Mar 18;6(1):e000712. doi: 10.1136/bmjsem-2019-000712 (PMC7101042; doi:10.1136/bmjsem-2019-000712), 2020-03-18
Supplement: bmjsem-2019-000712supp001.pdf [file bmjsem-2019-000712supp001.pdf]

**Supplementary Table 1:** Bootstrapped correlations by gender for the APSQ, K-10 and WEMWBS

|                      | APSQ Self-regulation | APSQ Performance | APSQ External Coping | APSQ Total      | K-10 Total      | WEMWBS          |
|----------------------|----------------------|------------------|----------------------|-----------------|-----------------|-----------------|
| APSQ Self-regulation | -                    | <b>.503***</b>   | <b>.527***</b>       | <b>.820***</b>  | <b>.714***</b>  | <b>-.463***</b> |
| APSQ Performance     | .637***              | -                | <b>.562***</b>       | <b>.882***</b>  | <b>.497***</b>  | <b>-.346***</b> |
| APSQ External Coping | .582***              | .495***          | -                    | <b>.757***</b>  | <b>.353*</b>    | <b>-.226*</b>   |
| APSQ Total           | .892***              | .893***          | .718***              | -               | <b>.655***</b>  | <b>-.437***</b> |
| K-10 Total           | .769***              | .641***          | .563***              | .786***         | -               | <b>-.574***</b> |
| WEMWBS               | <b>-.496***</b>      | <b>-.440***</b>  | <b>-.362***</b>      | <b>-.520***</b> | <b>-.480***</b> | -               |

Note. Bootstrapped with 10,000 resamples; Female coefficients bolded above the diagonal, \*= $p < .05$ , \*\*= $p < .01$ , \*\*\*= $p < .001$
